# Supplementary material for: Low Seroprevalence of WNV in Namibian Dogs Suggests a Limited Effectiveness as Sentinels for Infection Monitoring
Source: MDPI journal article supplement (doi:10.3390/tropicalmed8040203), 2023-03-29
Supplement: s1 [file s1]

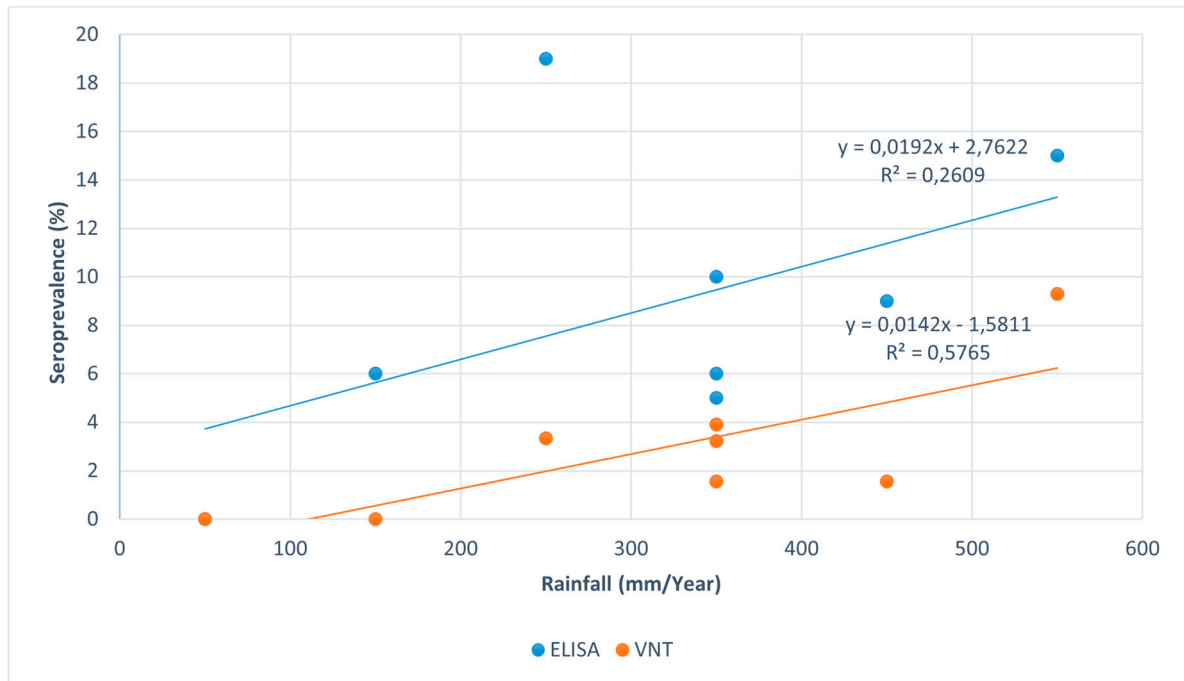

**Figure S1.** Scatterplot depicting the relationship between seroprevalence tested via ELISA and VNT and average rainfall (mm/year) in the considered regions. A regression line for the two assays has also been superimposed.
